# Supplementary material for: Mevalonate Pathway Enzyme HMGCS1 Contributes to Gastric Cancer Progression
Source: MDPI journal article supplement (doi:10.3390/cancers12051088), 2020-04-27

Figure 1C

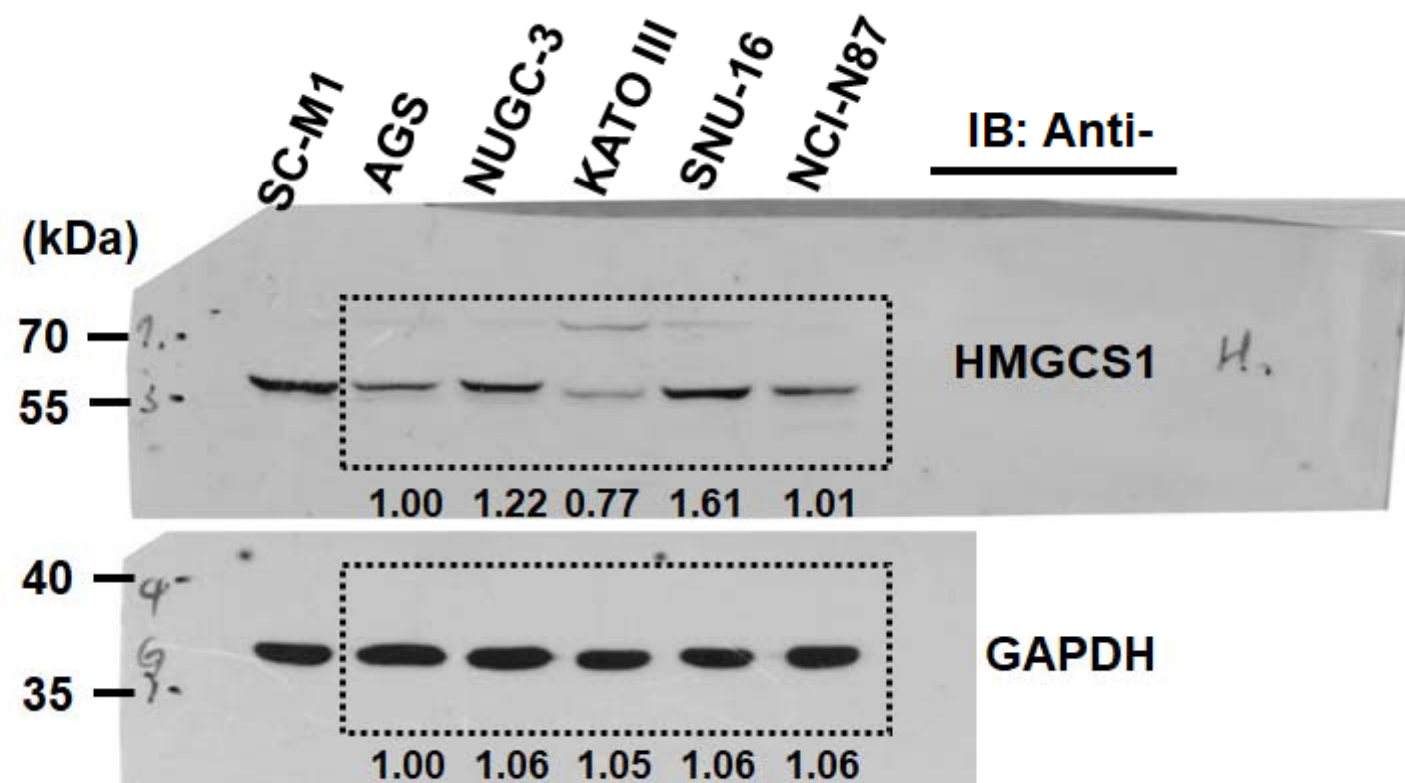

Figure 1E

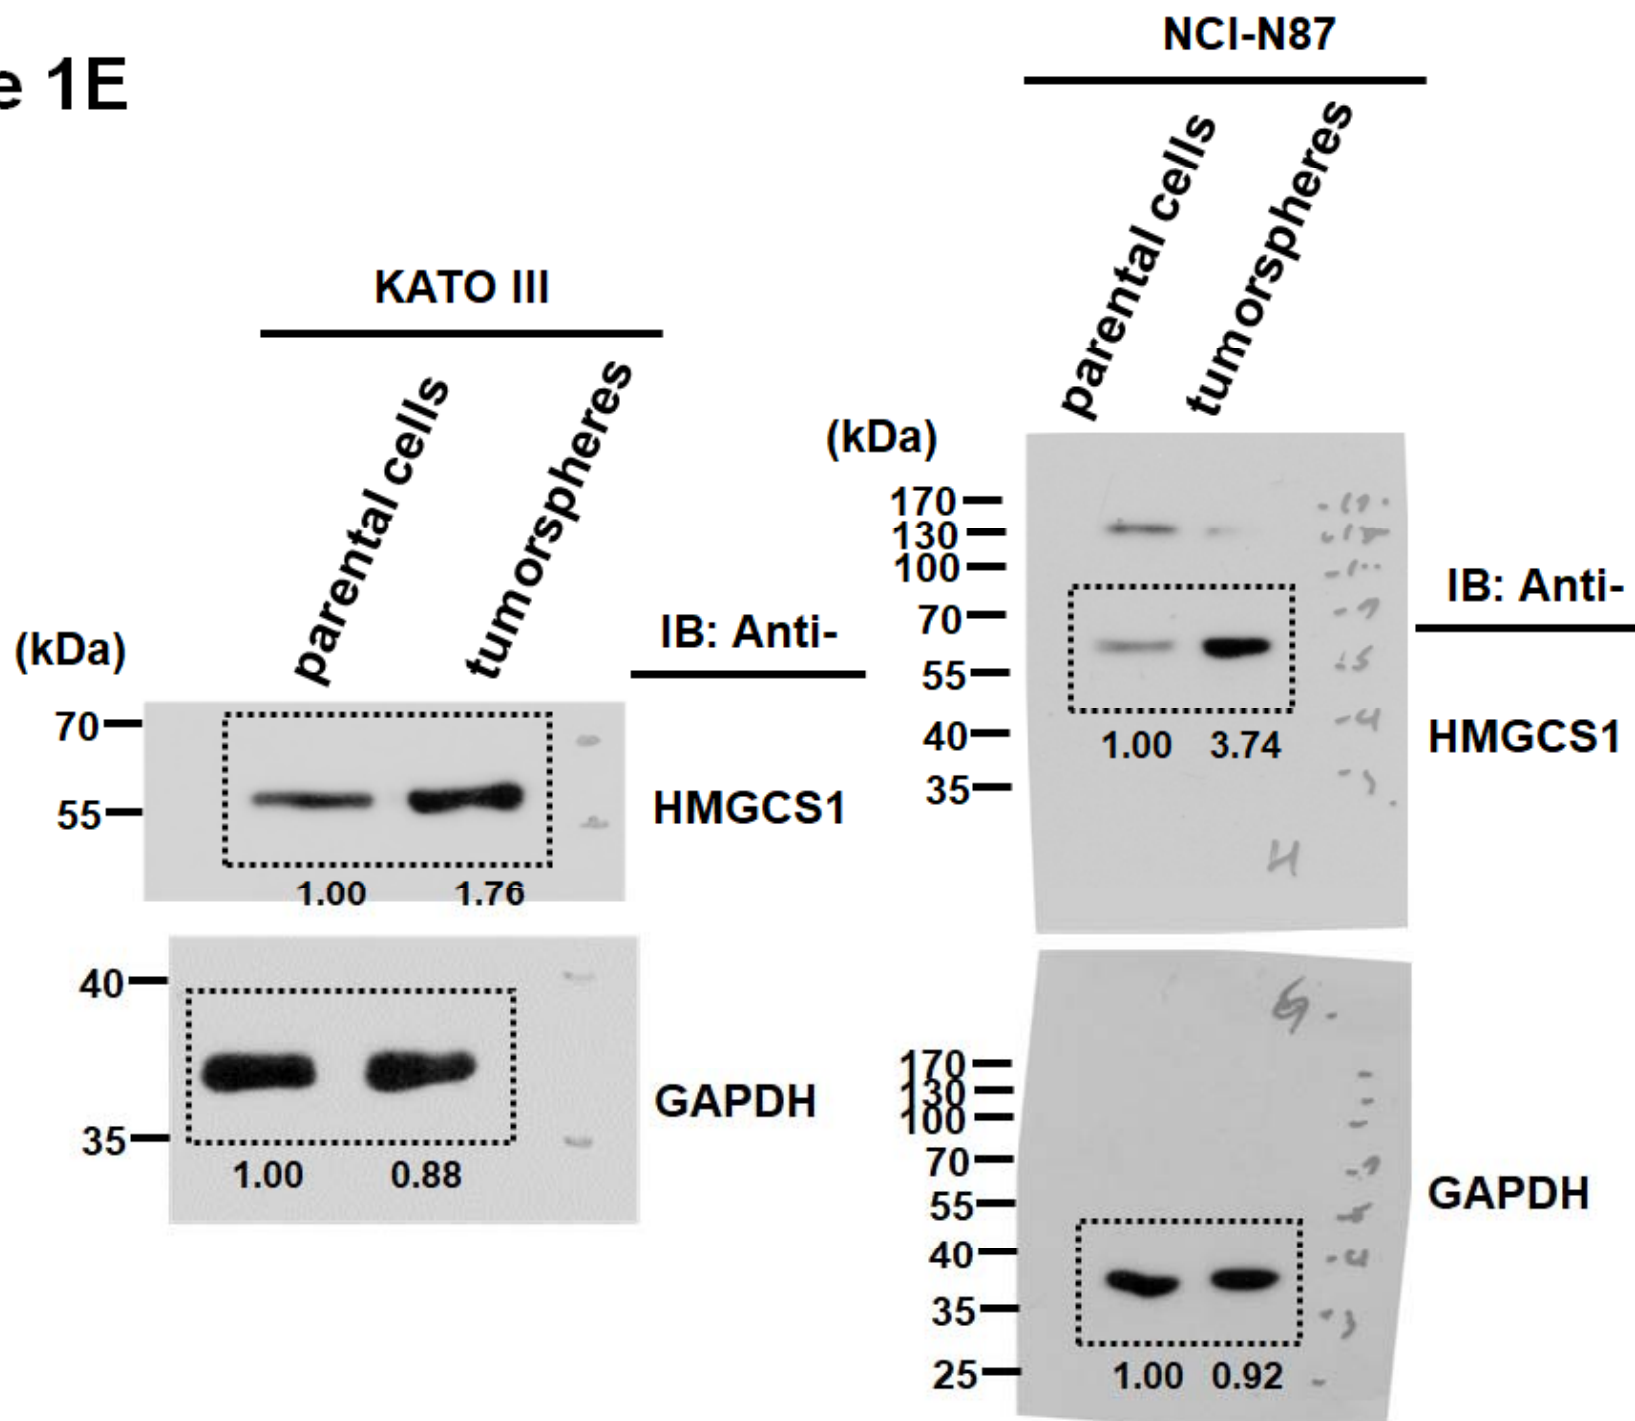

Figure 2B

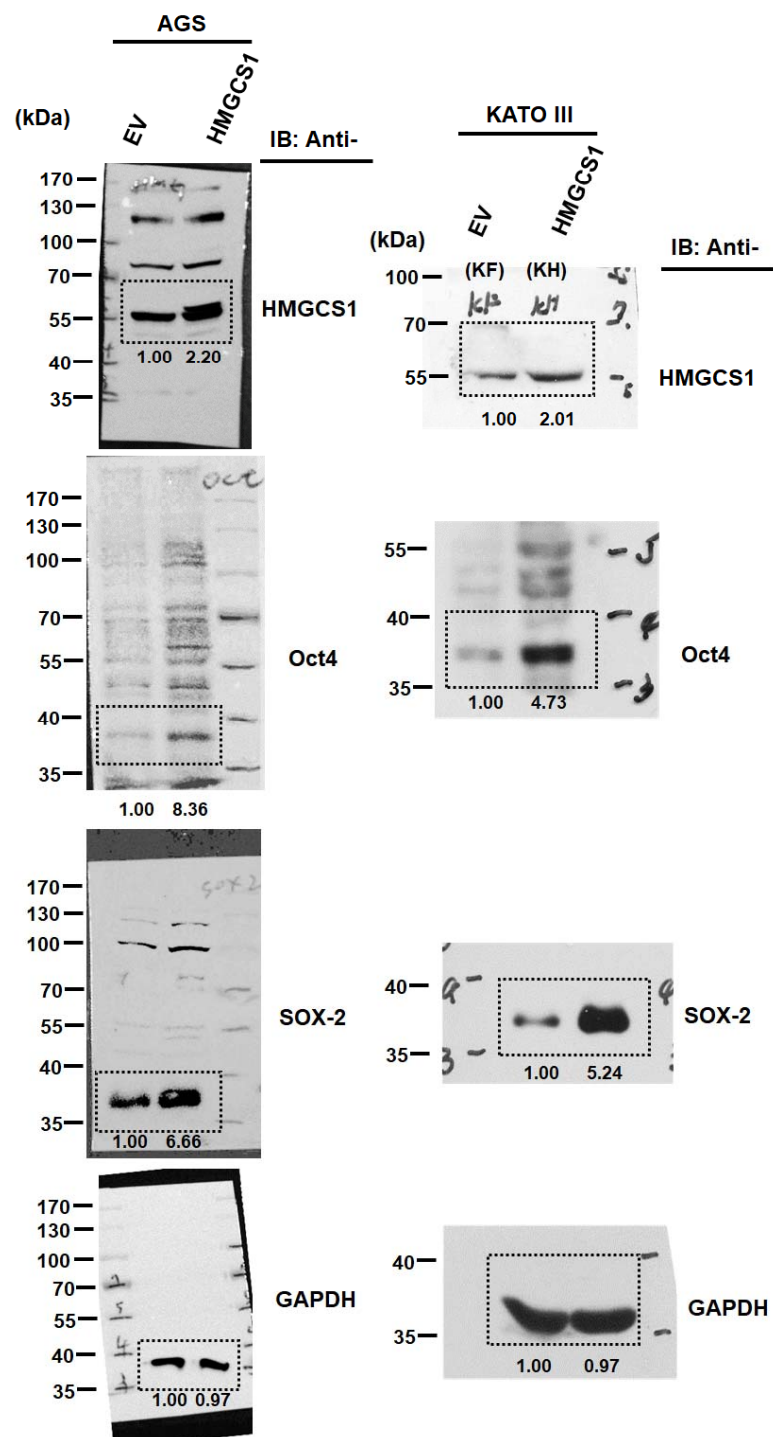

Figure 4A

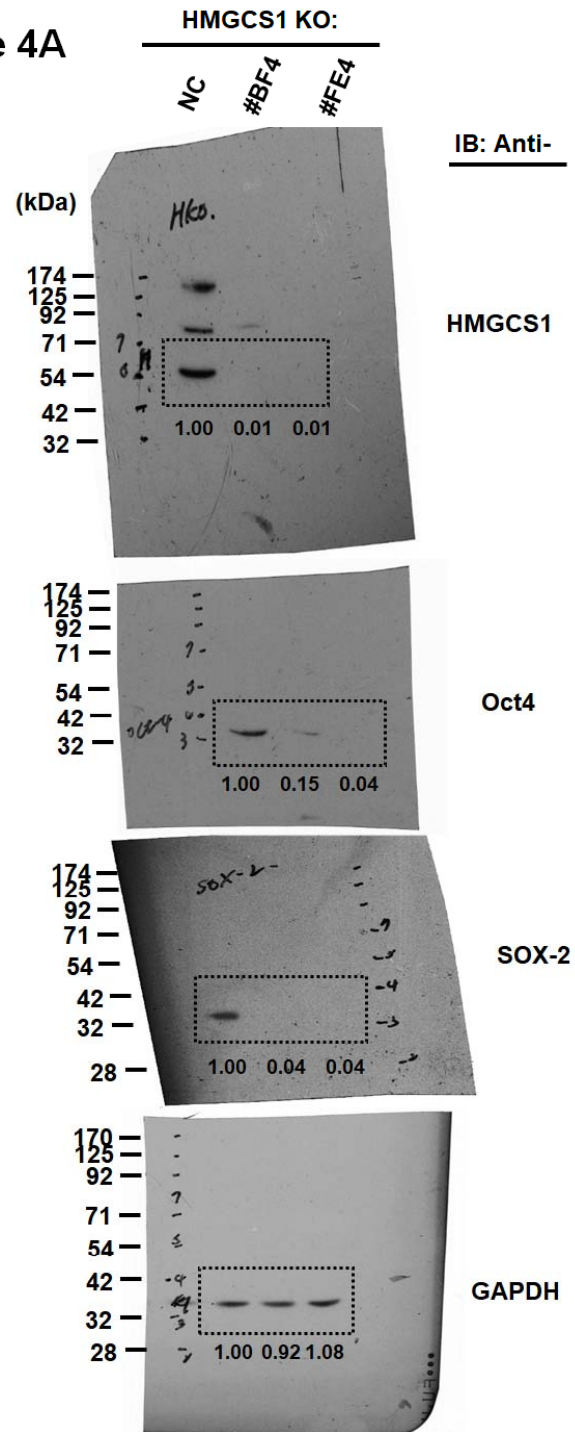

Figure 5A

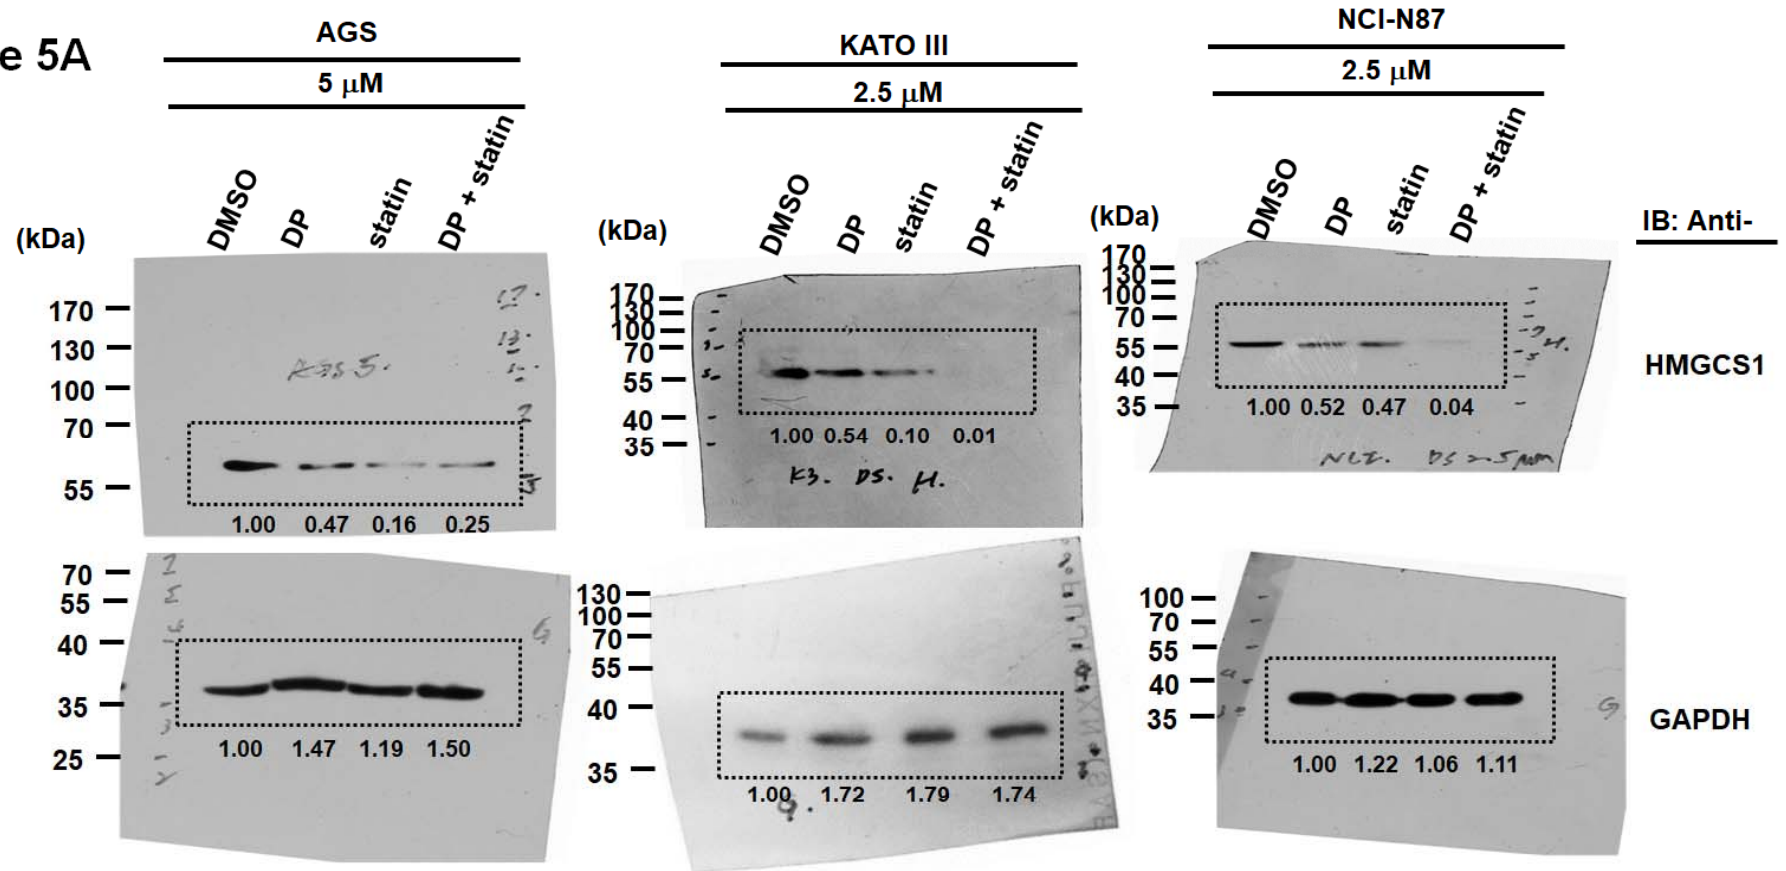

Figure 6A

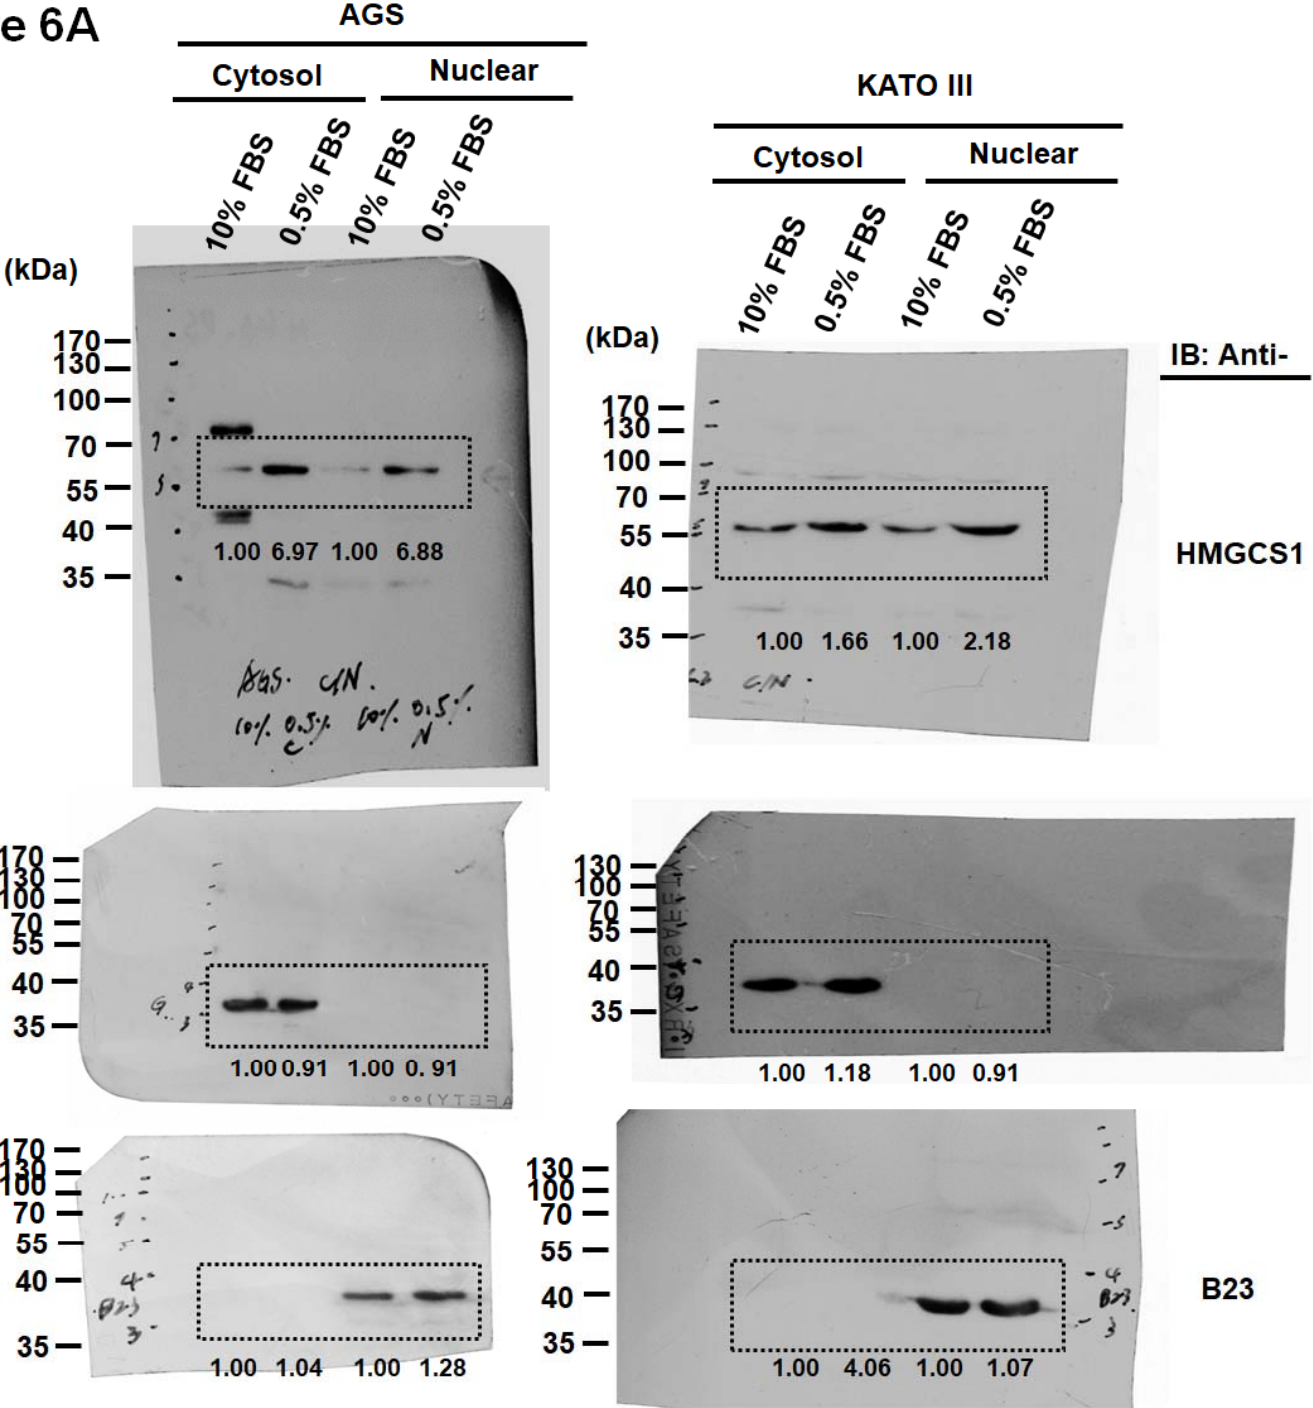

Figure 6B

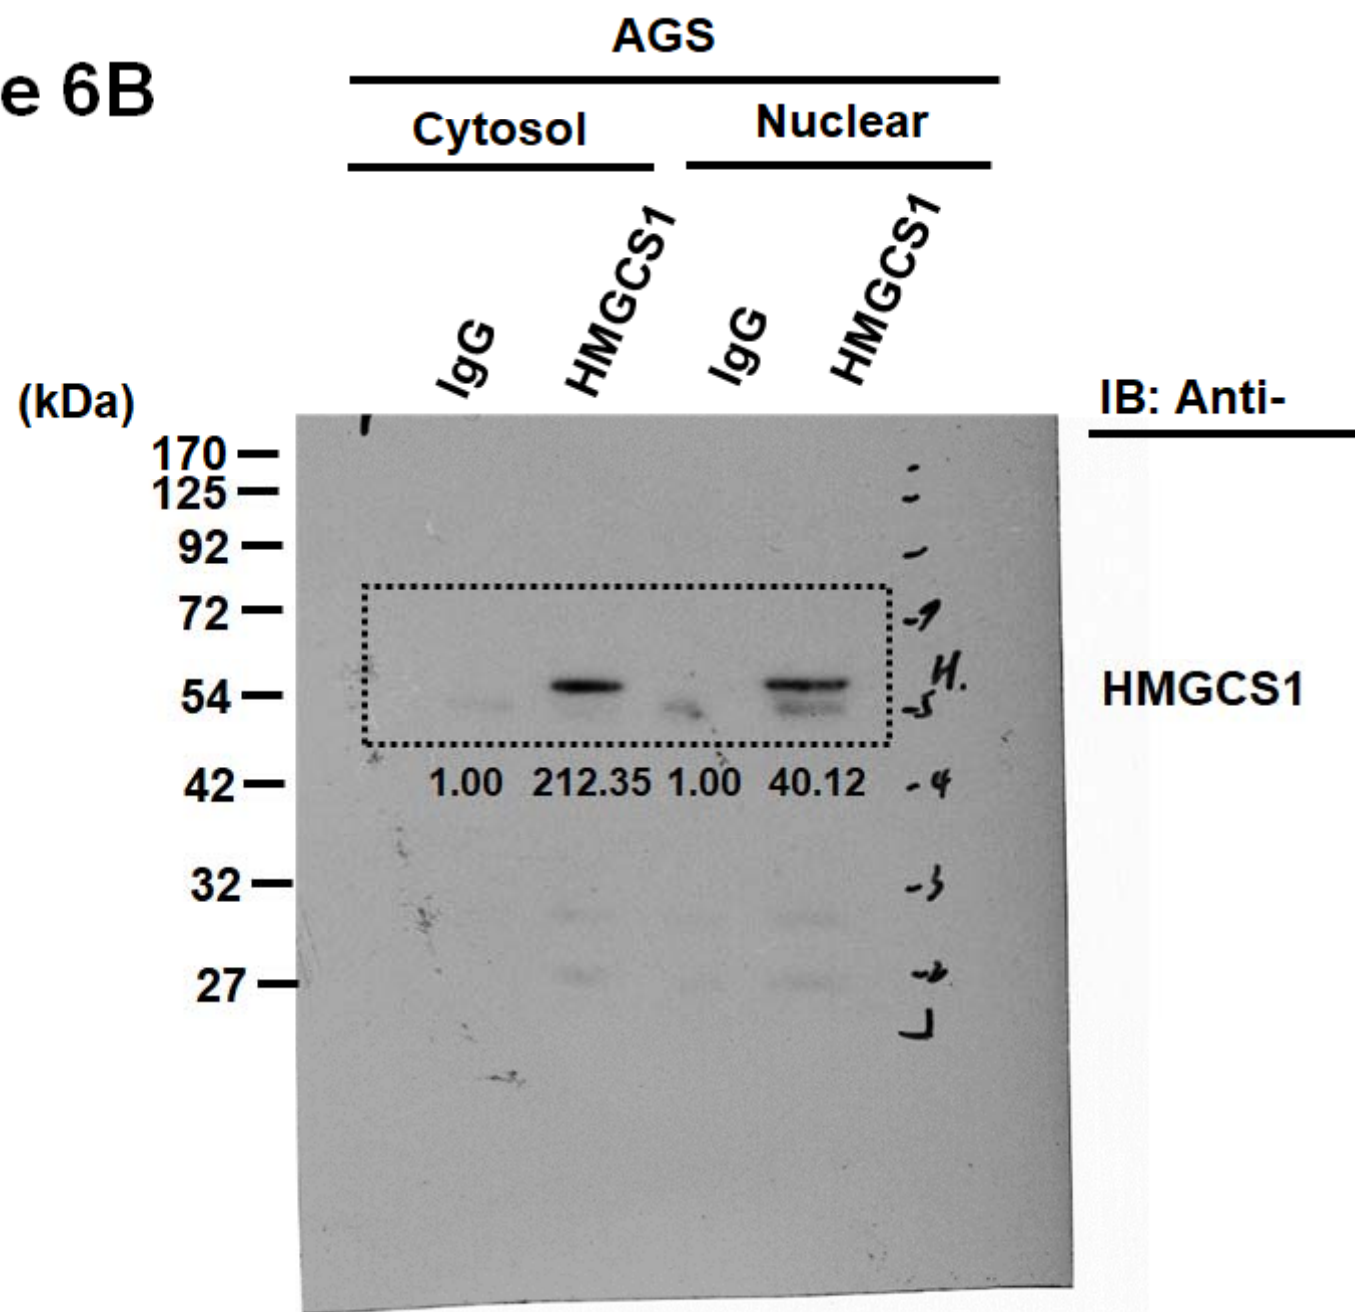



Figure 6E

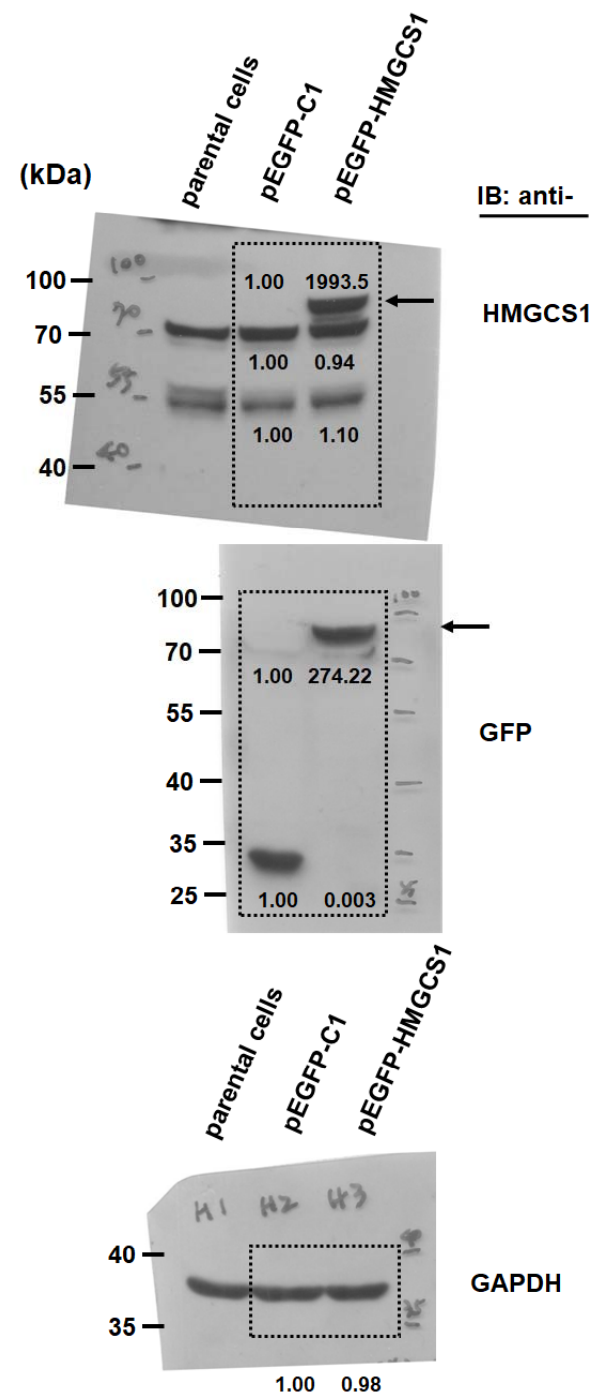



Figure 7A

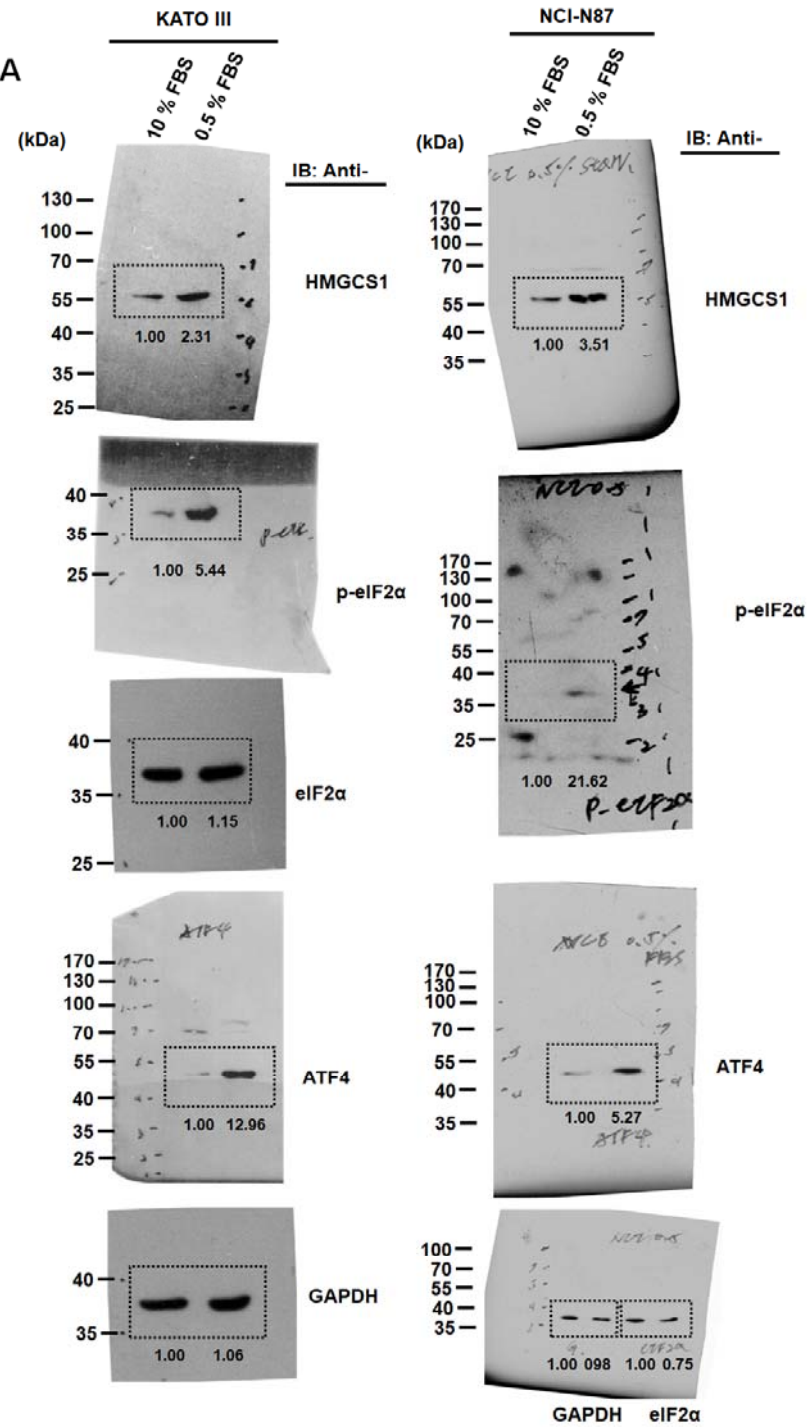

Figure 7B

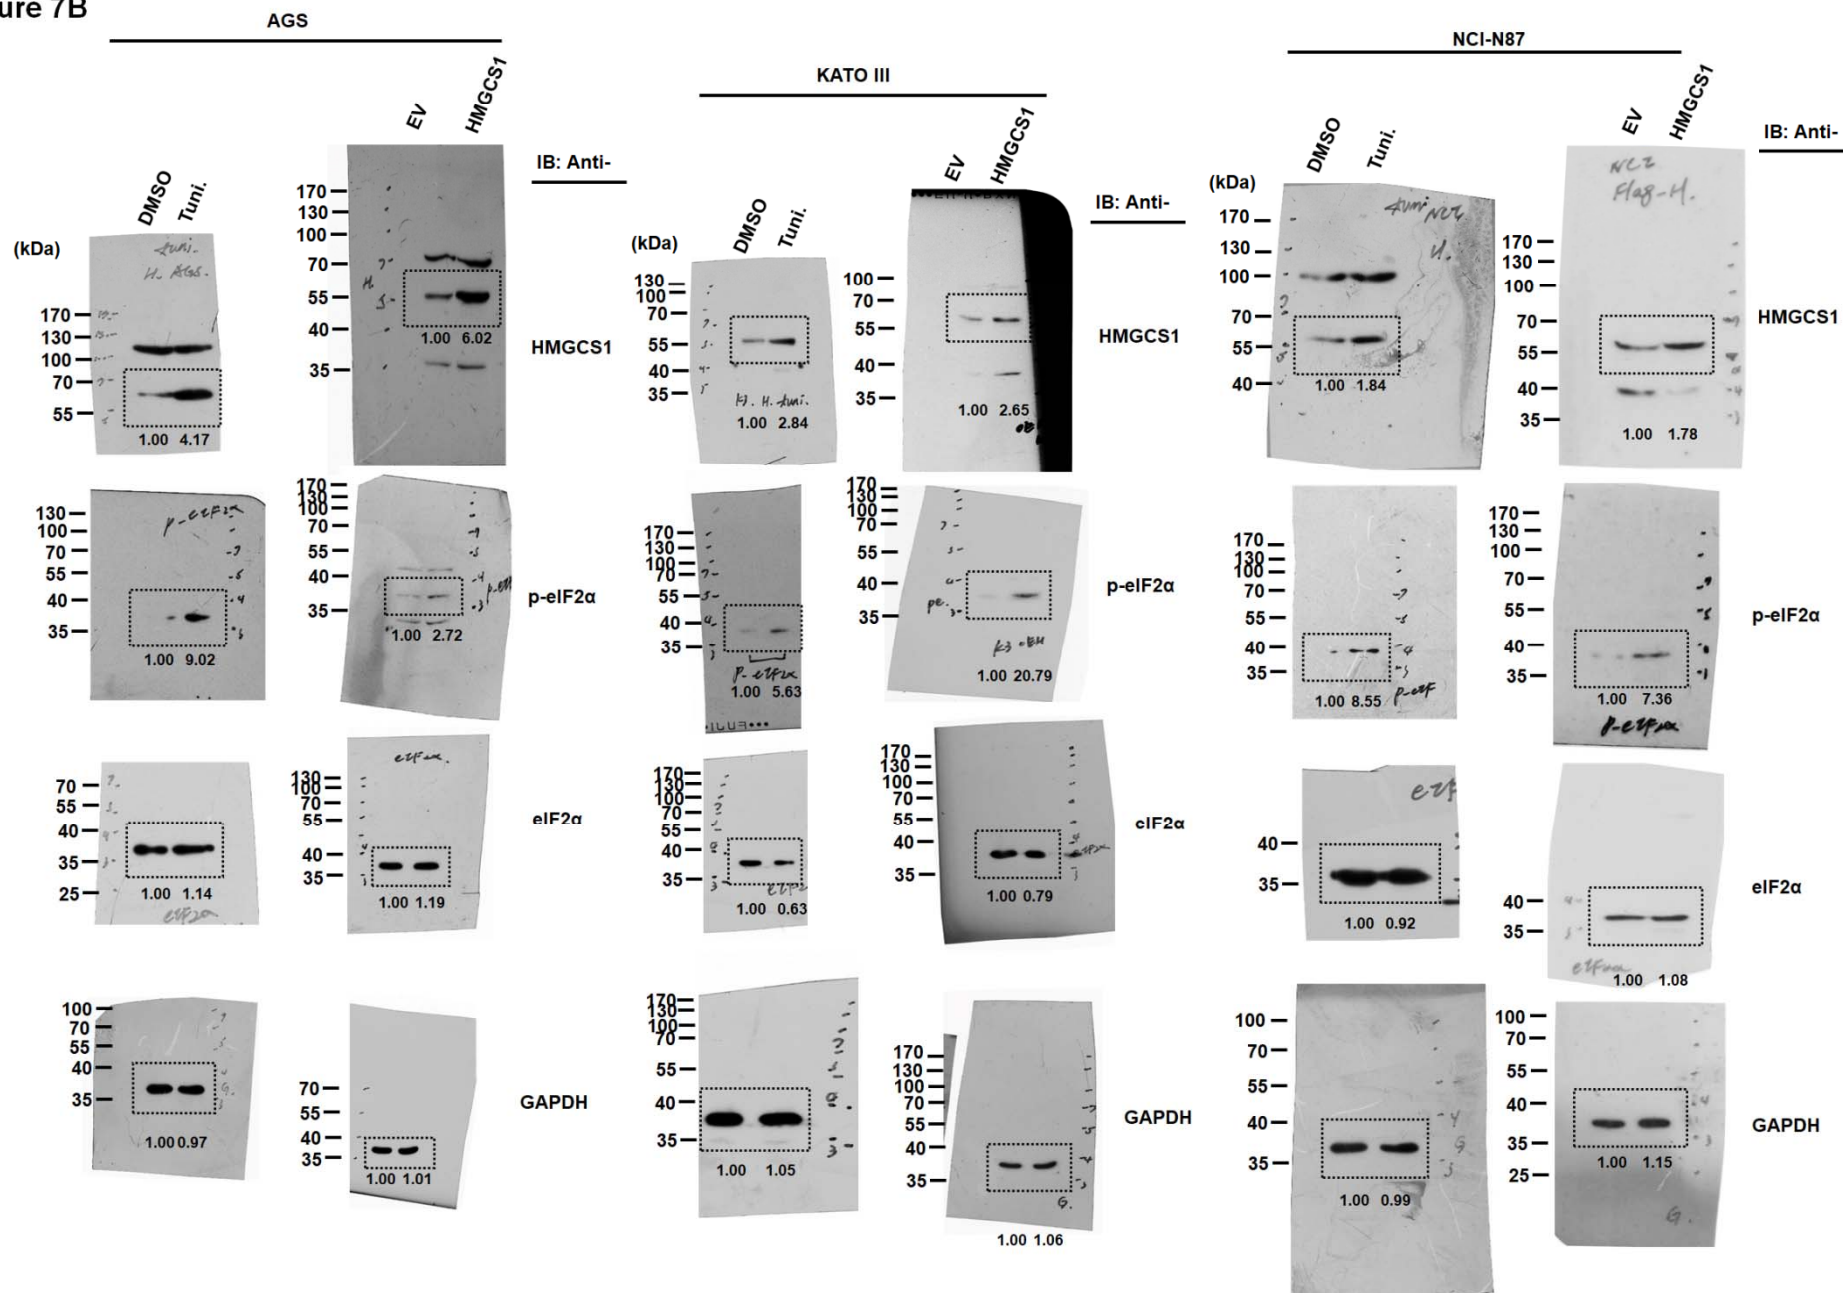

Figure 7C

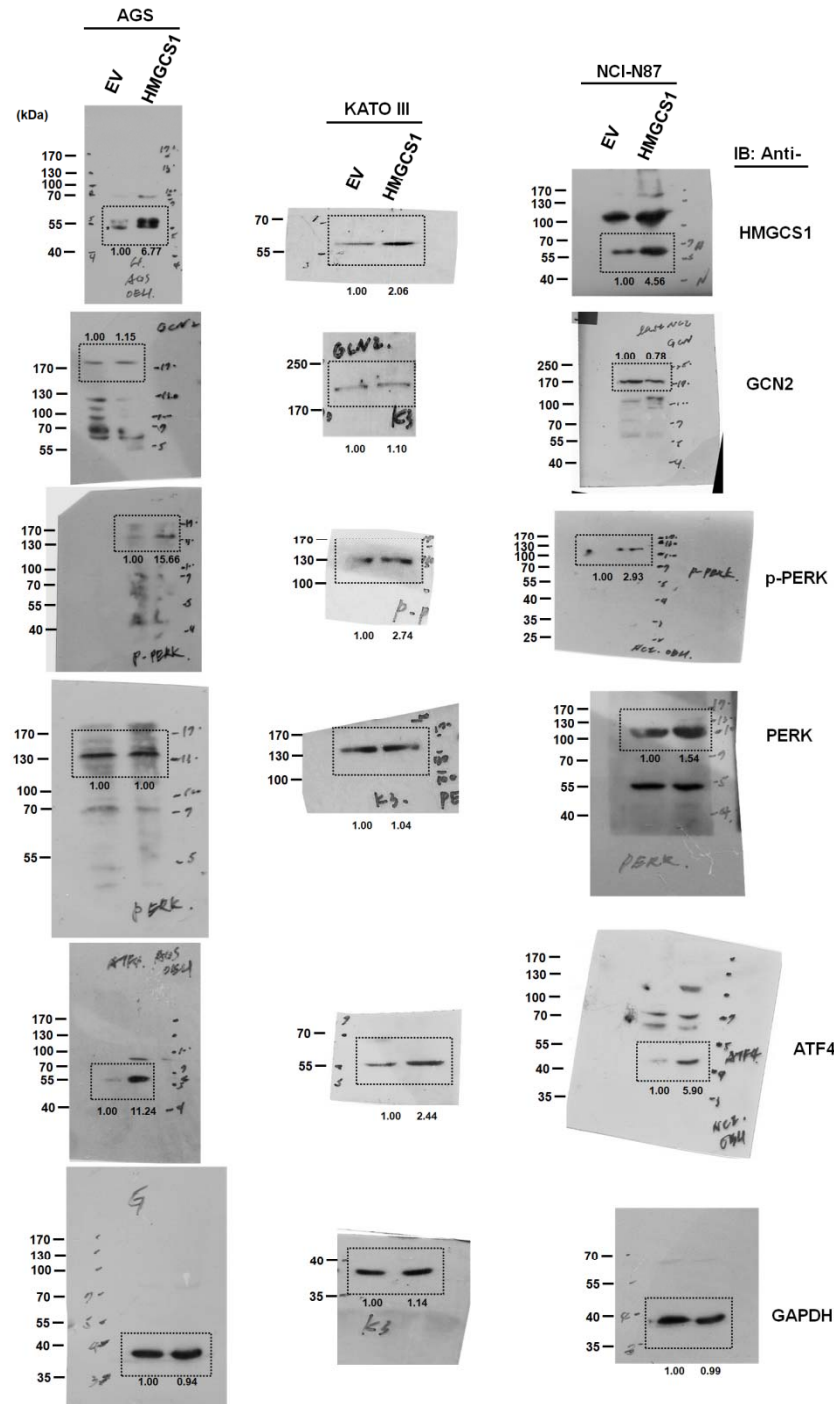

Figure 7E

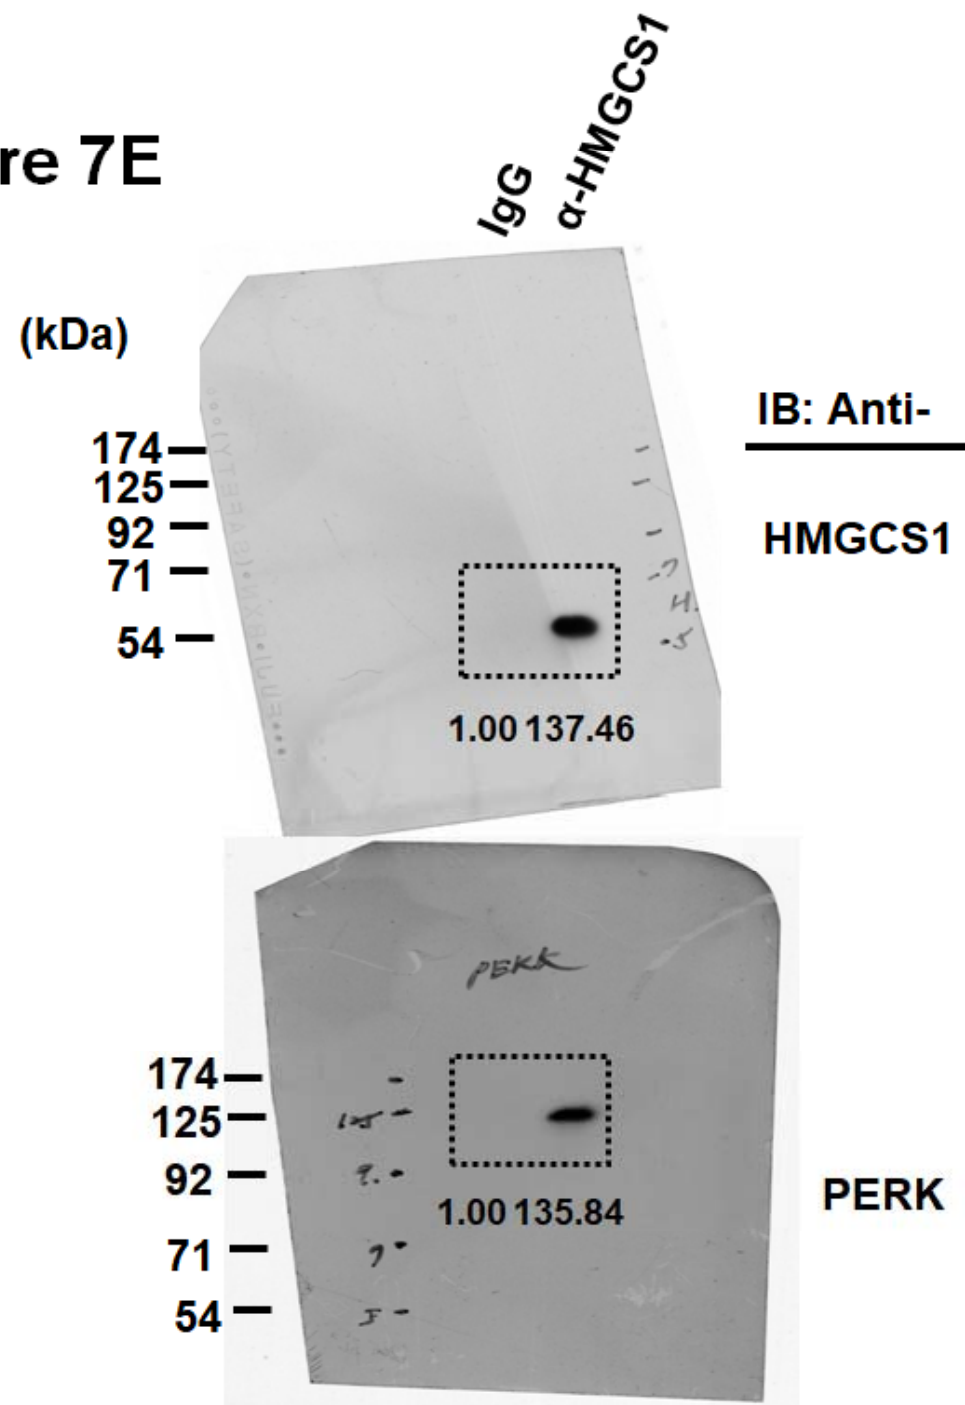

### Supplementary Figure S2B

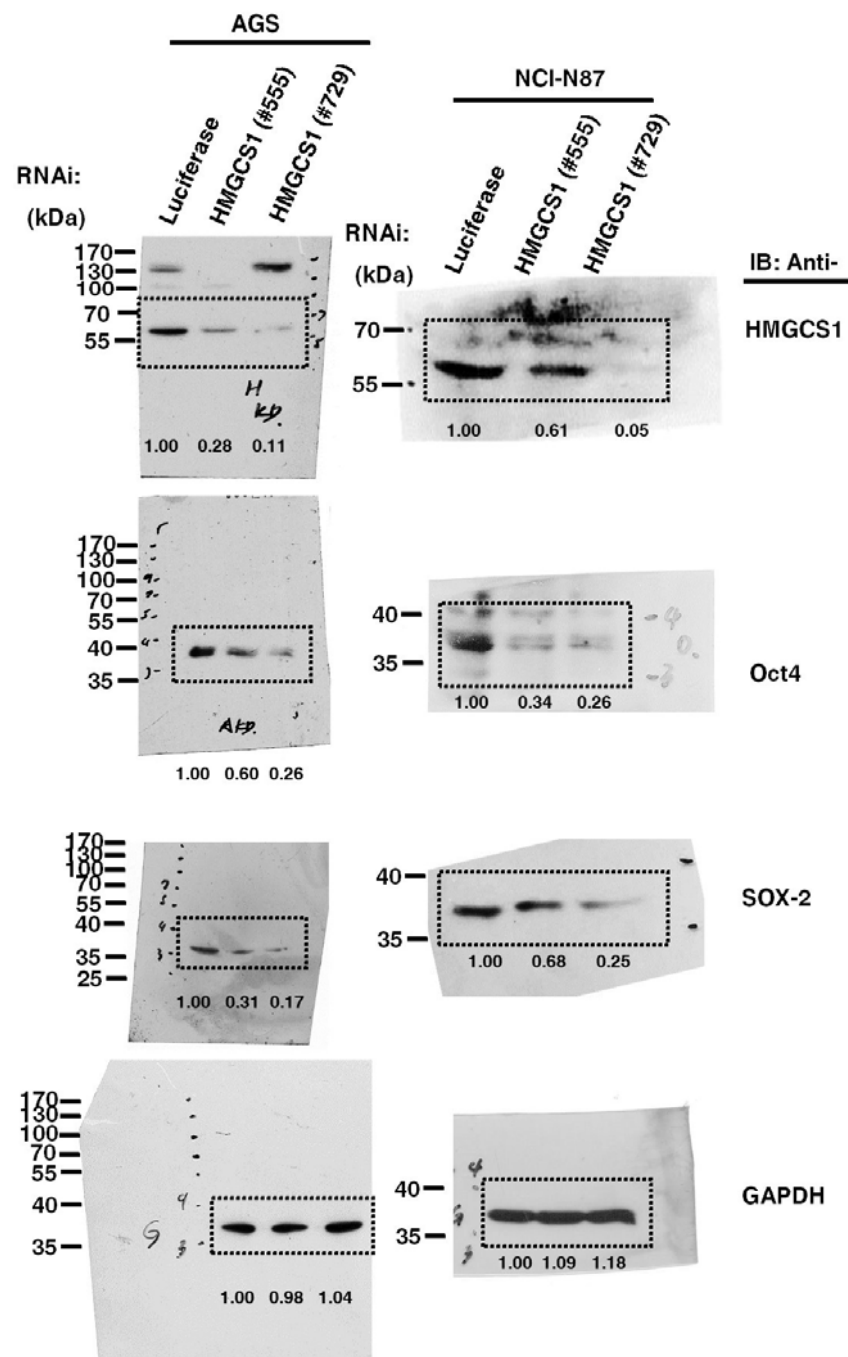

Supplementary Figure S5B

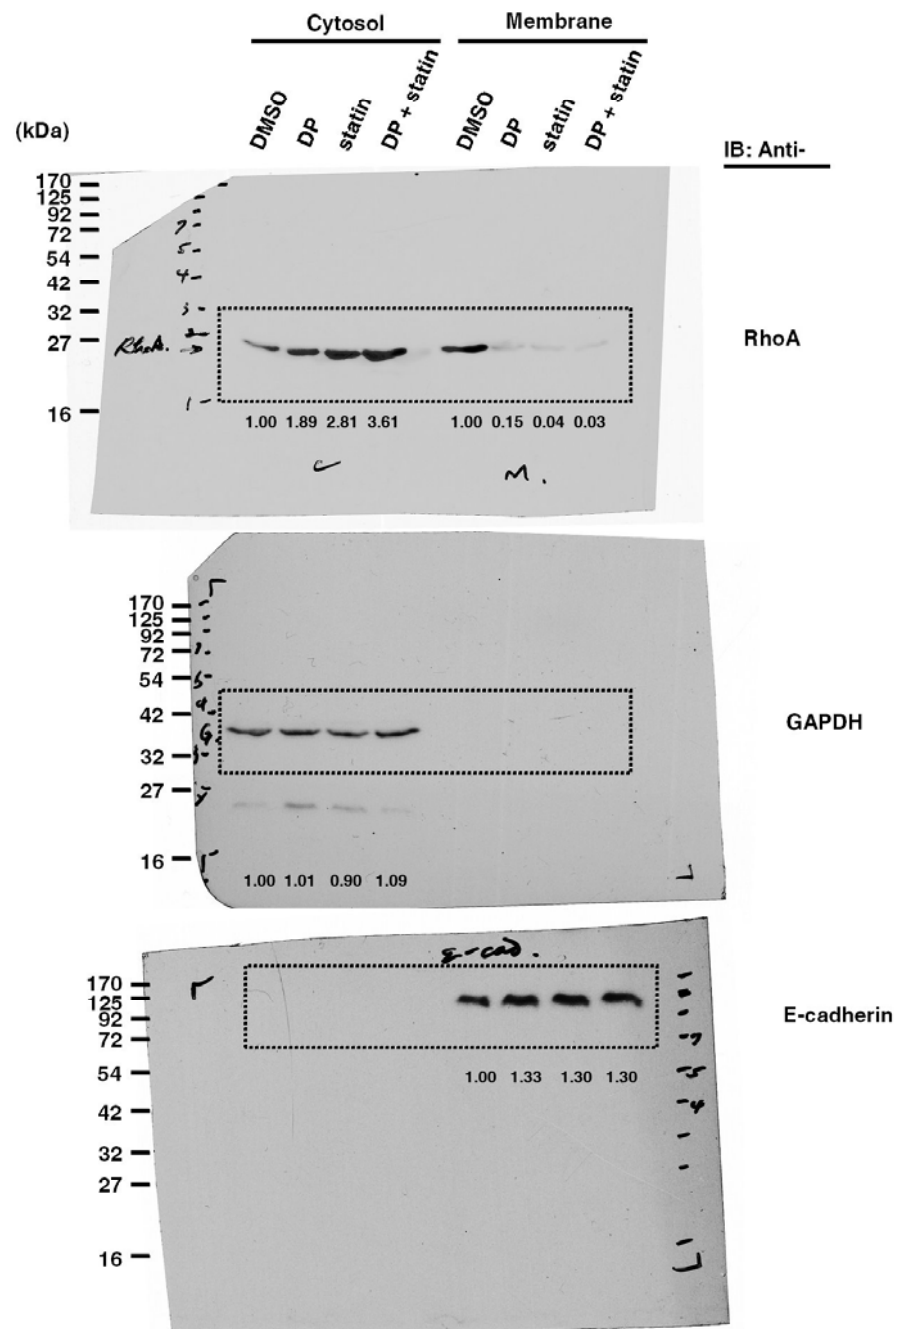

Supplement: s1 [file s1]
